# Supplementary material for: Christian Student Experiences During Peer Interactions in Undergraduate Biology Courses
Source: Atypon-hosted journal article supplement (doi:10.1187/cbe.23-01-0020), 2024-01-12
Supplement: combinedsupmats.pdf [file combinedsupmats.pdf]

# Supplemental Material

CBE—Life Sciences Education

Edwards et al.

**Supplementary Materials:**

This supplement contains the following:

| Item                                           | Page    |
|------------------------------------------------|---------|
| Copy of survey questions analyzed              | 2 – 5   |
| Copy of interview questions                    | 6 – 7   |
| Copy of codebook used for qualitative analysis | 8 – 12  |
| Participant demographics table                 | 13 – 14 |

33 **Additional File 1: Copy of Survey Questions Analyzed:**

34 ***Religious Affiliation:***

35 I most closely identify as:

- 36 • Buddhist
- 37 • Christian (for example, Catholic, Protestant, Orthodox, CJD-LDS, nondenominational)
- 38 • Hindu
- 39 • Jewish
- 40 • Muslim
- 41 • I don't identify with a religion (for example, atheist or agnostic)
- 42 • Option not available, please describe \_\_\_\_\_
- 43 • Decline to state

44

45 If “Christian” is chosen:

46 With what denomination of Christianity do you most closely identify?

- 47 • Catholic
- 48 • Jehovah's Witness
- 49 • Orthodox
- 50 • Nondenominational
- 51 • Protestant (for example, Baptist, Methodist, Pentecostal, Lutheran, Presbyterian)
- 52 • The Church of Jesus Christ of Latter-day Saints
- 53 • Option not available, please describe \_\_\_\_\_
- 54 • Decline to state

55

56 ***Religiosity:***

57

58 Please indicate how much you agree or disagree with the following statements:

59

60 I attend religious services regularly (when they are available).

- 61 • Strongly disagree
- 62 • Disagree
- 63 • Neutral
- 64 • Agree
- 65 • Strongly agree

66

67 I believe in God.

- 68 • Strongly disagree
- 69 • Disagree
- 70 • Neutral
- 71 • Agree

72 • Strongly agree

73

74 I consider myself a religious person.

75 • Strongly disagree

76 • Disagree

77 • Neutral

78 • Agree

79 • Strongly agree

80

81 I consider myself a spiritual person.

82 • Strongly disagree

83 • Disagree

84 • Neutral

85 • Agree

86 • Strongly agree

87

88 ***Year in School:***

89 What is your year in school?

90 • First/sophomore

91 • Junior/Senior

92 • Postgraduate

93 • Decline to state

94 ***Biology Major:***

95 Is your major in biology? (includes biomedical sciences, biology and society, conservation  
96 biology, genetics, neurobiology/physiology/behavior, microbiology, medical microbiology,  
97 molecular bioscience, neuroscience)

98 • Yes

99 • No

100 ***Intended Career:***

101 What is your intended career?

102 • Healthcare professionals (examples include Physician, Nurse, EMT). Please describe:

103 \_\_\_\_\_

104 • Research scientist (examples include Professor, Biologist, Chemist, Zoologist, Physicist,  
105 Geologist): Please describe: \_\_\_\_\_

106 • Option not available. Please describe: \_\_\_\_\_

107 • Decline to state

108 ***Parent Education Level:***

109 What is your parents' highest completed level of education? If you have more than one parent  
110 with differing levels of education, choose the higher of the two.

- 111 • Less than high school completed
- 112 • High school diploma or GED
- 113 • Some college but no degree
- 114 • Associate degree (for example: AA, AS)
- 115 • Bachelor's degree (for example: BA, AB, BS)
- 116 • Master's degree (for example: MA, MS, MEng, MEd, MSW, MBA)
- 117 • Higher than a Master's degree (for example: PhD, MD, JD)
- 118 • Decline to state

119 ***Gender:***

120 I most closely identify as:

- 121 • Woman
- 122 • Man
- 123 • Nonbinary
- 124 • Please describe your gender identity if the best option is not listed: \_\_\_\_\_
- 125 • Decline to state

126 ***Race:***

127 Choose the race/ethnicity with which you most closely identify:

- 128 • American Indian, Native American, or Alaskan Native
- 129 • Asian (Middle Eastern, East Asian, Southeast Asian, South Asian, West Asian)
- 130 • Black or African American
- 131 • Hispanic or Latinx
- 132 • Native Hawaiian or other Pacific Islander
- 133 • White
- 134 • Multiracial (please describe your multiple racial/ethnic identities) \_\_\_\_\_
- 135 • Option not available, please describe: \_\_\_\_\_
- 136 • Decline to state

137 ***Political Affiliation:***

138 Please indicate your political identity:

- 139 • Extremely Liberal
- 140 • Liberal
- 141 • Slightly Liberal
- 142 • Moderate
- 143 • Slightly Conservative

- 144 • Conservative
- 145 • Extremely Conservative
- 146 • Decline to state

147 ***View of Evolution:***

148 There are no right or wrong answers to this question. Please indicate which of the following  
149 statements most closely represents your personal view, **based on your personal opinion:**

- 150 • All forms of life were first brought into being in their present form by God 6,000-10,000  
151 years ago at the same time. (*Young Earth creationism*)
- 152 • All forms of life were first brought into being in their present form by God at different  
153 times over billions of years. (*Old Earth creationism*)
- 154 • Some forms of life evolved from earlier forms, but God created groups of organisms such  
155 as reptiles, birds, mammals, and humans separate from one another and organisms that  
156 currently exist have evolved slowly from those first creations. (*Creationism with some  
157 evolution*)
- 158 • Almost all forms of life evolved from earlier forms, but humans were created by God in  
159 their present form separate from the rest of life. (*Humans only creationism*)
- 160 • All forms of life evolved from earlier forms, but God intervenes from time to time to  
161 shape or override evolution. (*Interventionist evolution*)
- 162 • All forms of life evolved from earlier forms, but God set up evolution from the start in a  
163 perfect way so that it would fulfill God's purpose and no subsequent intervention was  
164 necessary. (*Theistic evolution*)
- 165 • All forms of life evolved from earlier forms, but life and evolution were first set in  
166 motion by God without a specific purpose or plan. (*Deistic evolution*)
- 167 • All forms of life evolved from earlier forms, but I'm not sure whether any God was  
168 involved in evolution. (*Agnostic evolution*)
- 169 • All forms of life evolved from earlier forms, but no God has ever played a role in  
170 evolution. (*Atheistic evolution*)

171  
172 *\*The italicized text in parentheses is the technical label of the evolution view that corresponds*  
173 *with each statement. The italicized text was not included on the official survey, but it is included*  
174 *here for readers' reference.*

175  
176  
177  
178  
179  
180  
181

182 **Additional File 2: Copy of Interview Questions:**

- 183 1. Talk to me a bit about your religious identity.
- 184 2. When you are interacting with peers in your biology courses, are you ever reminded of  
185 your religious identity?
- 186 3. Do you ever consider your religious identity when choosing who to sit by in class?
- 187 4. Talk to me about what you perceive are the potential benefits of being religious when  
188 interacting your peers in your biology courses, particularly during peer discussion.
- 189 5. Talk to me about what you perceive are the potential disadvantages are of being religious  
190 when interacting with your peers in your biology courses, particularly during peer  
191 discussion.
- 192 6. To what extent do you reveal that you are religious to students in your biology courses?
- 193 7. Can you tell me about instances in your biology courses when you have had the chance to  
194 reveal to your peers that you are religious, but decided not to?
- 195 8. Can you tell me about instances when you *have* revealed that you are religious to one of  
196 your peers in your biology courses?
- 197 9. How do you decide whether or not to tell a peer in your biology courses that you are  
198 religious?
- 199 10. Talk to me about the potential risks you see, if any, of revealing your religious identity to  
200 other students in your biology classes.
- 201 11. Talk to me about the potential benefits you see, if any, of revealing your religious identity  
202 to other students in your biology classes.
- 203 12. Compared to a traditional lecture course, do you feel like there are more opportunities to  
204 reveal your religious identity in courses that incorporate peer discussion?
- 205 13. If you were to tell a peer in your biology courses that you are religious, would you worry  
206 about what they would think about you? Why or why not?
- 207 14. Are there particular ways you talk about your religious identity with your peers to avoid  
208 any negative perceptions?
- 209 15. Have any of your peers in your biology courses ever done anything that made you feel  
210 like they did not value you as a person who is religious?
- 211 16. Have any of your peers in your biology courses ever done anything that made you think  
212 they *did* value you as a person who is religious?
- 213 17. How would you feel if another student revealed to you that they were religious during a  
214 discussion in your biology course?
- 215 a. Would your feelings depend on whether someone had the same religious identity  
216 than you?
- 217 b. How do you think these feelings compare to how you would feel if another  
218 student revealed that they are an Atheist?
- 219 18. How does your religious identity influence your comfort level when you are interacting  
220 with your peers, particularly during peer discussion?

- 221 a. Are there any topics that you would feel less comfortable discussing because of  
222 your religious identity?  
223 i. Like what?

224 19. Logic question:

- 225 a. If they said they have revealed: To what extent do you feel  
226 b. If they said they have not revealed: To what extent do you think you would feel  
227 i. comfortable in a peer discussion where you have revealed that you are  
228 religious to at least one other person?

229 20. Is there anything else you would like to talk about related to your experiences as a  
230 religious student during peer discussions in your biology courses?

231  
232  
233  
234  
235  
236  
237  
238  
239  
240  
241  
242  
243  
244  
245  
246  
247  
248  
249  
250  
251  
252  
253  
254  
255  
256  
257  
258  
259  
260



261 **Additional File 3: Copy of Codebook Used for Qualitative Analysis:**

262

263 **Saliency:**

264 a) **Specific topics:** Student explains that their religious identity is more salient when  
265 they are discussing particular topics with their peers that may conflict with their  
266 identity or topics for which their opinions are partially shaped by their religion such  
267 as evolution, genetics, or bioethics topics.

268 b) **Differences among students:** Student explains that their religious identity is more  
269 salient when they are interacting with their peers and are reminded that their views or  
270 behaviors are different from their peers' due to their religious identity.

271 c) **Awe at creation:** Student says they are reminded of their religious identity when they  
272 are discussing a science topic that they perceive to be incredibly intricate or  
273 impressive because it reminds them that their creator made everything and is amazing

274 d) **Not reminded:** Student says their religious identity is never especially salient when  
275 they are interacting with their peers.

276 I. **Silo religion and science:** Student says that when they are talking with their  
277 peers, they keep science separate from their religion. Student may say they try  
278 to think about the science itself rather than thinking about what their religion  
279 would say about it.

280

281 **Benefits of being religious:**

282 b) **More open-minded:** Student states that one benefit of being religious is that they are  
283 more open-minded, respectful, or empathetic when hearing their peers' views.

284 a) **Passion for Biology:** Student explains that one benefit of being religious is that their  
285 religion increases their enthusiasm, appreciation, or passion for biology.

286 b) **Different perspective:** Student says that one benefit of being religious is that they  
287 add unique perspectives to conversations in biology courses because of their religious  
288 background.

289 c) **Already considered their views:** Student says that one benefit of being religious is  
290 that, because of their religious identity, they have already deeply thought about their  
291 views on many potentially controversial issues that come up in class and may know  
292 what they think about those topics already. Student may also say that students who  
293 are not religious may not have thought about their views on those topics until they  
294 were brought up in class.

295

296 **Disadvantages of being religious:**

297 a) **Stereotypes:** Student says that one disadvantage of being religious is that if their  
298 peers find out about their religious identities, they may make assumptions about the  
299 student and associate them with stereotypes of religious people or judge them.

300 b) **Closed-minded peers:** Student says that one disadvantage of being religious is their  
301 peers may be unwilling to listen to them, be closed-minded towards them, or be  
302 confrontational if they find out they were religious.

- 303 c) **Difficulty relating to peers:** Student says that one disadvantage of being religious is  
304 that because they are religious and they perceive most of their students are not, many  
305 of their peers think or behave differently than they do, which can make it difficult to  
306 connect with them.
- 307 d) **Making other students feel uncomfortable:** Student says that one disadvantage of  
308 being religious is that their being religious may make other students in the class feel  
309 uncomfortable. Student may mention that their peers' discomfort could stem from  
310 their past personal experiences with religion/religious people or the assumptions that  
311 they may make about religious people's attitudes or behaviors.

312

313 **Tendency to Reveal:**

- 314 a) **Never or rarely because of (anticipated stigma):** Student says that they rarely or  
315 never reveal their religious identity to peers in their biology classes depending on the  
316 person and situation because they have concerns about what their peer would think of  
317 them if they were to reveal.
- 318 b) **Never or rarely because no opportunities:** Student says they never or rarely reveal  
319 their religious identity in their biology class because there are not opportunities. The  
320 student does not say that they would reveal if they could.
- 321 c) **Freely:** Student says that they freely reveal their religious identity to peers in their  
322 biology classes any time it feels relevant or comes up in conversation.
- 323 I. **Reveals Frequently:** Student says that they frequently reveal their religious  
324 identity in their biology classes.
- 325 II. **Reveals Rarely:** Student says that they rarely reveal their religious identity in  
326 their biology classes because they do not have the opportunity to do so, but  
327 they say that they would reveal if they did have the opportunity to.

328

329 **Reveal or conceal:**

- 330 a) **Open-mindedness of peer:** Student says that they would be willing to reveal if their  
331 peer seems like they are open-minded or nice or would be willing to listen to or be  
332 respectful of their perspective OR student says they would not be willing to reveal if  
333 their peers seemed closed-minded or unwilling to respectfully listen to their  
334 perspective.
- 335 b) **Relevance to discussion:** Student says that they would be willing to reveal if it  
336 seemed relevant to the discussion they were having with their peers OR student says  
337 that they would not be willing to reveal if doing so meant bringing their religious  
338 identity up out of nowhere when it was not relevant to the conversation.
- 339 c) **Closeness with peer:** Student says that they would be willing to reveal if they knew  
340 the peer or were friends with them OR student says they would not be willing to  
341 reveal if they had just met the peer or hardly knew them.
- 342 d) **Other peer is religious:** Student says that they would reveal they were religious if  
343 their peers revealed that they were religious first.
- 344 e) **Opportunity to evangelize:** Student says that they would reveal they were religious  
345 because it may help others to become religious. Student may say it brings them joy or

346 helps them fulfill their duty as a Christian to talk about their religion with those who  
347 are not religious. Student may also mention they could invite their peers to church or  
348 answer any questions they have about religion if they reveal that they are religious.  
349

350 **Anticipated Stigma:**

- 351 a) **Stereotypes:** Student says that if a peer knew they were religious, they may  
352 stereotype, judge, or make false assumptions about them based on their religious  
353 identity.
- 354 I. **Don't believe in science:** Student says that they think many individuals  
355 would assume that they don't believe in science or some aspect of it, like  
356 evolution.
  - 357 II. **Less scientifically capable:** Student says that they think many individuals  
358 would discredit them or assume they are less of a scientist or less capable of  
359 being a scientist than nonreligious individuals
  - 360 III. **No free will:** Student says that they think many individuals would assume that  
361 they cannot make decisions for themselves or are required to do and say  
362 things because of their religion.
  - 363 IV. **Judgmental or closed-minded:** Student says that they think many individuals  
364 would assume that they are judgmental of other people or closed-minded  
365 about the views of others.
  - 366 V. **Denomination specific stereotypes:** Student mentions that they think many  
367 individuals would make assumptions about them based on their specific  
368 denomination of Christianity. For example, a student who is LDS may say  
369 they think that people assume they get have many children or that the men  
370 have multiple wives, or a student who is Catholic may say they think people  
371 might assume they are a bad person because of the views and behaviors  
372 associated with the faith, like pedophilia or homophobia.
  - 373 VI. **Convert:** Student says that they think many individuals would assume that  
374 they are always attempting to convert their peers or people they interact with.
  - 375 VII. **Naïve:** Student says that they think many individuals would assume they are  
376 naïve because of their faith or turn a blind eye to fact and truth.
- 377 b) **Social repercussions:** Student says they may lose friends or be excluded from peer  
378 groups or working groups because of their religious identity. Student may also say  
379 their peers may dislike them or think less of them if they knew they were religious or  
380 be less willing to interact with them.
- 381 c) **Confrontation:** Student says that if their peers knew they were religious, it could  
382 lead to arguments, confrontation, or tension with them.  
383  
384

385 **Experienced Stigma:**

- 386 a) **Positive/neutral experience:** Student says that when they revealed they were  
387 religious to a peer, the experience was positive or neutral.

- 388 b) **Assumed incompatibility of religion and science:** Student says that their peers  
389 express shock or surprise at the idea that someone can be religious and accept  
390 science.
- 391 c) **Jokes/negative comments about religious people:** Student says that peers in their  
392 biology courses have made jokes or negative comments about religious people during  
393 class.
- 394 d) **Mention anticipated stigma despite no experienced stigma:** Student explicitly  
395 recognizes and mentions that they realize that they anticipate stigma from their peers  
396 due to their religious identity even though they have never actually experienced  
397 stigma.
- 398 e) **Never experienced stigma:** Student says that they have never experienced stigma  
399 during discussions with their peers because of their religious identity.  
400

401 **Impression management strategies:**

- 402 a) **Doesn't push religion on others:** Student says that when they reveal they are  
403 religious, they will do so in a way that allows their peer to decide if they want to  
404 continue the discussion or not, or they try not to bring their religion up in discussion  
405 at all.
- 406 b) **Discusses casually:** Student says they discuss their religion in a casual way so it  
407 doesn't seem like a big deal to their peers, or student says they will bring up the  
408 commonly accepted ideals of their religion but not the more controversial ones. For  
409 instance, students may say they go to church but not reveal more details about their  
410 specific religious beliefs. Student may also say they will bring religion up in a relaxed  
411 or simple way.
- 412 c) **Speak positively about religion:** Student says that they talk about their religion in a  
413 positive way or highlights what they like about their religion to avoid negative  
414 perceptions.
- 415 d) **Self-group distancing/assimilating:** Student reveals in a way that separates  
416 themselves from the stereotypes typically associated with religious individuals.
- 417 I. **Accepts science:** Student reveals that they are religious but makes it clear that  
418 they also accept science.
- 419 II. **Has individual thought:** Student reveals they are religious but discusses it  
420 carefully to make it clear that they think deeply about their faith and have free  
421 will regarding what they do and believe.
- 422 III. **Politics:** Student reveals that they are Christian but says that they are  
423 politically liberal or progressive.
- 424 IV. **Different than their religion:** Student emphasize that they do not agree with  
425 some of the sentiments and behavior of their church or religion, its leaders, or  
426 its followers. Students may say they believe in foundational ideals like loving  
427 one another but disagree with more controversial ideas typically associated  
428 with the faith.  
429  
430

431 **Benefits of revealing:**

- 432 a) **Finding other religious students:** Student says that a benefit of revealing to their  
433 peers is that they may find other students who are also religious because they feel  
434 similar to them.
- 435 b) **Religion and science coexisting:** Student says that a benefit of revealing is that they  
436 can show their peers, both those who are religious or nonreligious, that people can be  
437 religious and believe in science.
- 438 c) **Others reveal:** Student says that a benefit of revealing is that their peers may also  
439 feel comfortable enough to reveal their own religious identity.
- 440 d) **Increases closeness with peers:** Student says that a benefit of revealing is that their  
441 peers can get to know them better and they may grow closer from the vulnerability of  
442 revealing.

443

444 **Opportunities to reveal:**

- 445 a) **Yes:** Student says that they do think there are more opportunities to reveal their  
446 religious identity in courses that incorporate peer discussion.
- 447 I. **Increased discussion:** Student says that they do think there are more  
448 opportunities to reveal because with increased discussion with peers comes  
449 increased opportunity for things like religious identity to come up or be  
450 shared.
- 451 II. **Closer relationships:** Student says that they do think there are more  
452 opportunities to reveal because increased discussion means students are more  
453 likely to get close to each other, so they would be more likely to share  
454 personal information like religion. Student may say this is especially the case  
455 when they have discussions with the same peers throughout the semester.
- 456 III. **Small group:** Student says that they do think there are more opportunities to  
457 reveal because they are in smaller groups so people may be more likely to  
458 share that they are religious in those settings or may feel more comfortable  
459 doing so.
- 460 b) **No, religion is not relevant:** Student says that they do not think there are more  
461 opportunities to reveal their religious identity because even when students are talking  
462 to each other, religion still is not relevant to the conversation, so it does not come up.

463 **Additional File 4: Participant Demographics Tables:**

464 Table S1. Each participant’s religious denomination, religiosity, view of evolution, year in school, race, and political identity.

| <b>Pseudonym</b> | <b>Christian Denomination</b>                   | <b>Religiosity</b> | <b>View of Evolution</b>  | <b>Year in School</b> | <b>Race</b>        | <b>Political Identity</b> |
|------------------|-------------------------------------------------|--------------------|---------------------------|-----------------------|--------------------|---------------------------|
| Jamie            | Nondenominational                               | 3.5                | Theistic evolution        | Junior/Senior         | White              | Moderate                  |
| Molly            | The Church of Jesus Christ of Latter-Day Saints | 4.75               | Interventionist evolution | Junior/Senior         | White              | Slightly conservative     |
| Megan            | Catholic                                        | 3.5                | Agnostic evolution        | First year/Sophomore  | Hispanic or Latinx | Extremely liberal         |
| Daniel           | The Church of Jesus Christ of Latter-Day Saints | 4.75               | Theistic evolution        | Junior/Senior         | White              | Conservative              |
| Grace            | The Church of Jesus Christ of Latter-Day Saints | 5                  | Theistic evolution        | Junior/Senior         | White              | Slightly liberal          |
| Ira              | Nondenominational                               | 2.75               | Interventionist evolution | First year/Sophomore  | Asian              | Liberal                   |
| Peter            | Nondenominational                               | 3.5                | Old Earth Creationism     | First year/Sophomore  | Asian              | Slightly conservative     |
| Melody           | Catholic                                        | 4.25               | Agnostic evolution        | Junior/Senior         | Hispanic or Latinx | Liberal                   |
| Erin             | Catholic                                        | 4.75               | Theistic evolution        | First year/Sophomore  | Hispanic or Latinx | Slightly conservative     |
| Sofia            | Protestant                                      | 3.5                | Human only creationism    | First year/Sophomore  | Hispanic or Latinx | Moderate                  |
| Maria            | Nondenominational                               | 4                  | Theistic evolution        | Junior/Senior         | Hispanic or Latinx | Extremely liberal         |
| Connor           | Nondenominational                               | 4.5                | Theistic evolution        | First year/Sophomore  | White              | Moderate                  |
| Allan            | The Church of Jesus Christ of Latter-Day Saints | 5                  | Young Earth creationism   | Junior/Senior         | White              | Conservative              |
| Trinity          | Nondenominational                               | 4.5                | Theistic evolution        | First year/Sophomore  | Asian              | Slightly liberal          |

|         |                                                 |      |                                 |                      |                    |                       |
|---------|-------------------------------------------------|------|---------------------------------|----------------------|--------------------|-----------------------|
| Lori    | Nondenominational                               | 5    | Creationism with some evolution | Junior/Senior        | Asian              | Conservative          |
| Brooke  | Nondenominational                               | 3.75 | Theistic evolution              | First year/Sophomore | White              | Slightly liberal      |
| Camila  | Catholic                                        | 4.25 | Deistic evolution               | First year/Sophomore | White              | Liberal               |
| Brandon | Catholic                                        | 4    | Creationism with some evolution | First year/Sophomore | Hispanic or Latinx | Liberal               |
| Erica   | Protestant                                      | 4    | Deistic evolution               | Junior/Senior        | White              | Slightly conservative |
| Javier  | Catholic                                        | 4.5  | Theistic evolution              | Junior/Senior        | Hispanic or Latinx | Liberal               |
| Macie   | Nondenominational                               | 1    | Human only creationism          | First year/Sophomore | White              | Slightly conservative |
| Iris    | Nondenominational                               | 4.75 | Young Earth creationism         | First year/Sophomore | Multiracial        | Liberal               |
| Julia   | Catholic                                        | 4.5  | Agnostic evolution              | Junior/Senior        | Hispanic or Latinx | Liberal               |
| Levi    | Protestant                                      | 4.5  | Old Earth Creationism           | First year/Sophomore | White              | Conservative          |
| Luke    | The Church of Jesus Christ of Latter-Day Saints | 5    | Creationism with some evolution | Junior/Senior        | White              | Conservative          |
| Diego   | Catholic                                        | 5    | Deistic evolution               | Junior/Senior        | Hispanic or Latinx | Moderate              |
| Olivia  | Nondenominational                               | 4.5  | Theistic evolution              | First year/Sophomore | Hispanic or Latinx | Liberal               |
| Gabby   | The Church of Jesus Christ of Latter-Day Saints | 3.75 | Theistic evolution              | First year/Sophomore | White              | Moderate              |
| Amie    | The Church of Jesus Christ of Latter-Day Saints | 4.25 | Creationism with some evolution | Junior/Senior        | White              | Moderate              |
| Kristin | The Church of Jesus Christ of Latter-Day Saints | 5    | Creationism with some evolution | Junior/Senior        | White              | Slightly liberal      |
